# Supplementary material for: Microsurgical efficacy in 326 children with tethered cord syndrome: a retrospective analysis
Source: PubMed Central journal article supplement — Neural Regen Res. 2019 Jan;14(1):149–55. doi: 10.4103/1673-5374.243720 (PMC6262992; doi:10.4103/1673-5374.243720), 2019-01
Supplement: NRR-14-149_Suppl2.pdf [file NRR-14-149_Suppl2.pdf]

**Open peer review report 2**

**Reviewer:** Brandon Miller, University of Kentucky, USA.

**Comments to the authors:**

This paper belongs in more of a clinical journal. It could be enhanced by adding several tables.

This manuscript benefit greatly from a table showing patient characteristics and a comparison of outcomes across the different causes of tethered spinal cord. Age at time of surgery, duration of symptoms, presenting symptoms for different types of tethering pathology would be of interest. The authors' large cohort of patients is impressive, and more of a comparison study between the different pathologies at one institution would be helpful.
